# Supplementary material
Source: publisher site journal article supplement (https://www.spandidos-publications.com/5512/downloadSupplementary)
Supplement: Supplementary file 1 [file downloadSupplementary]

## Sheet: Sheet1
Table SV. Genes positively correlated with GNPNAT1 in BRCA in the UALCAN database.
Genes	Pearson's CC
PSMC6	0.78
STYX	0.75
L2HGDH	0.69
DDHD1	0.63
ARF6	0.6
FANCM	0.56
TXNDC16	0.56
SOS2	0.55
C14orf166	0.55
NAA30	0.55
GMFB	0.55
CNIH	0.53
TMX1	0.52
C14orf104	0.52
IDE	0.52
EXOC5	0.52
TM9SF3	0.52
SOCS4	0.51
PRRC1	0.51
SDCCAG1	0.51
PPP2R5E	0.5
DAAM1	0.5
USP38	0.49
EIF4E	0.49
SCYL2	0.49
KIAA0586	0.49
JKAMP	0.49
DHX15	0.49
GPR137C	0.49
CTAGE5	0.49
IBTK	0.48
LARP4	0.48
KIAA0391	0.48
DENR	0.48
PTGES3	0.48
MGAT2	0.48
C14orf129	0.47
ATP5S	0.47
TMEM184C	0.47
TMTC3	0.47
DTWD2	0.47
COPB1	0.47
KLHL8	0.47
EIF2S1	0.47
TNPO1	0.47
CPSF2	0.47
PUS7L	0.47
MUDENG	0.47
G3BP2	0.47
RALGAPA1	0.47
HEATR5A	0.46
PLEKHF2	0.46
SEC24A	0.46
PDS5A	0.46
C14orf106	0.46
CS	0.46
RPAP3	0.46
TMED2	0.46
GTF2H3	0.46
G2E3	0.46
ACTR10	0.46
SFRS1	0.46
TMEM167A	0.46
ELMOD2	0.46
ECT2	0.46
GFM1	0.46
FAM35A	0.46
FAM84B	0.45
TOMM70A	0.45
LASS6	0.45
RBM12	0.45
TMEM87B	0.45
UBE2K	0.45
SLC30A9	0.45
TOP1	0.45
CNOT6	0.45
HMGCR	0.45
MRPL42	0.45
SMARCAD1	0.45
WDR36	0.45
AGGF1	0.45
NAA15	0.45
NAA25	0.45
STRN3	0.45
MAPK1IP1L	0.45
UTP15	0.45
SLC30A5	0.45
TMEM33	0.45
RIOK2	0.45
POLE2	0.45
SLC10A7	0.44
SLC25A46	0.44
EIF3J	0.44
ZBTB6	0.44
TRAPPC6B	0.44
OPA1	0.44
SCAMP1	0.44
WDR89	0.44
2022-03-05	0.44
TDG	0.44
IPO7	0.44
VEZT	0.44
ARFIP1	0.44
ZMPSTE24	0.44
NMD3	0.44
UEVLD	0.44
PPM1A	0.44
SNX6	0.44
PSMD5	0.44
SLC35F5	0.44
ZNF28	0.44
PAPOLA	0.44
MRPL30	0.44
FBXW2	0.44
ERO1L	0.43
SLC35A5	0.43
PGGT1B	0.43
FAM91A1	0.43
GSPT1	0.43
RANBP9	0.43
CSNK1A1	0.43
RBM27	0.43
WAPAL	0.43
CUL3	0.43
API5	0.43
ZNF468	0.43
SPTY2D1	0.43
IARS	0.43
PTPN11	0.43
ATP2A2	0.43
FKTN	0.43
FCF1	0.43
EFR3A	0.43
SMAD5	0.43
KIAA1715	0.43
HECTD1	0.43
SLAIN2	0.43
TMEM192	0.43
RAD23B	0.43
C9orf41	0.43
GRHL2	0.43
EIF5	0.43
PPP1CC	0.43
UHRF1BP1L	0.43
TNKS2	0.42
FAM199X	0.42
ITCH	0.42
RAB14	0.42
NUBPL	0.42
DIP2B	0.42
PPIL5	0.42
HN1L	0.42
NBN	0.42
MARVELD2	0.42
CCAR1	0.42
ZBTB11	0.42
AVL9	0.42
CDC23	0.42
TOR1AIP2	0.42
YIPF6	0.42
COPB2	0.42
UBR1	0.42
C8orf83	0.42
CLOCK	0.42
SLC2A10	0.42
C14orf126	0.42
SLC39A9	0.42
TRMT5	0.42
SEC23B	0.42
LOC144438	0.42
FAF2	0.42
UBR7	0.42
POLR3B	0.42
PPP1R15B	0.42
PANK3	0.42
DARS2	0.42
TTC37	0.42
MTDH	0.42
LYSMD3	0.42
APC	0.42
GMCL1	0.42
TWF1	0.42
CLINT1	0.42
TMED7	0.41
MBTPS2	0.41
RNF139	0.41
AQR	0.41
KIF3B	0.41
HSPA9	0.41
KRR1	0.41
RARS	0.41
USP7	0.41
ARID2	0.41
SLC25A40	0.41
USO1	0.41
ANKRD32	0.41
STT3B	0.41
MATR3	0.41
KIAA1430	0.41
CHUK	0.41
SPATS2	0.41
EIF4G2	0.41
C4orf29	0.41
PHAX	0.41
C4orf41	0.41
SCOC	0.41
SFRS13A	0.41
IREB2	0.41
GRSF1	0.41
ABCE1	0.41
LRPPRC	0.41
UBXN4	0.41
PDCD6IP	0.41
SEC24B	0.41
KPNA1	0.41
C14orf135	0.41
C5orf43	0.41
IPO11	0.41
AZIN1	0.41
ADNP	0.41
KIAA0196	0.41
GFM2	0.41
DPY19L4	0.41
SRP54	0.41
USP9X	0.41
ETF1	0.41
UBA6	0.41
RBBP5	0.41
LMBR1	0.41
C12orf66	0.41
APOOL	0.41
METAP2	0.41
RAB10	0.41
YTHDF3	0.41
TXNDC9	0.41
SRFBP1	0.41
CDS1	0.41
AP3B1	0.41
FLVCR1	0.41
SFRS2IP	0.41
EIF2AK3	0.41
ZFP91	0.41
EPT1	0.4
HMGXB4	0.4
MPHOSPH9	0.4
TMOD3	0.4
ERGIC1	0.4
MAP9	0.4
SETD7	0.4
BCLAF1	0.4
RACGAP1	0.4
TRIP11	0.4
MAPK1	0.4
GTF2A1	0.4
PRDM4	0.4
ICK	0.4
C5orf51	0.4
ACTR2	0.4
CTDSPL2	0.4
SMARCA5	0.4
MOBKL3	0.4
NLN	0.4
MLH3	0.4
SLC35A3	0.4
SUDS3	0.4
RBM45	0.4
C2orf29	0.4
SYNJ2BP	0.4
C12orf23	0.4
GOLGA5	0.4
PRDX3	0.4
LARP1B	0.4
C9orf80	0.4
SRP72	0.4
C2orf69	0.4
C16orf72	0.4
STAM2	0.4
SEC24D	0.4
LRRC58	0.4
C14orf138	0.4
TMED10P1	0.4
FBXO21	0.4
UBQLN1	0.4
YIPF5	0.4
USP47	0.4
KIAA0317	0.4
MPP5	0.4
PURB	0.4
LIN54	0.4
VDAC1	0.4
SPTLC2	0.4
POC1B	0.4
CHD8	0.39
CRNKL1	0.39
SEC23IP	0.39
UBE2W	0.39
BTBD10	0.39
LCLAT1	0.39
SP1	0.39
PAK2	0.39
PUM2	0.39
C10orf46	0.39
YY1	0.39
AASDHPPT	0.39
ERI2	0.39
NIPAL2	0.39
SCARB2	0.39
FYTTD1	0.39
ZNF770	0.39
KIAA1033	0.39
COPS4	0.39
KLHL28	0.39
SUPT16H	0.39
GPR160	0.39
PPP2CA	0.39
CSNK2A1P	0.39
APAF1	0.39
MAP4K5	0.39
YWHAB	0.39
UHRF1BP1	0.39
HNRNPF	0.39
DCUN1D1	0.39
RAB3D	0.39
FAR1	0.39
QTRTD1	0.39
EPB41L5	0.39
ORC5L	0.39
SLC33A1	0.39
TRUB1	0.39
CDC27	0.39
ZNF268	0.39
TMED10	0.39
HLTF	0.39
ARL1	0.39
CASC5	0.39
CPNE3	0.39
GXYLT1	0.39
SLK	0.39
UBE2N	0.39
HNRNPK	0.39
THUMPD3	0.39
RBAK	0.39
C5orf24	0.39
FUBP3	0.39
PHC3	0.39
NDUFS1	0.39
PDXDC1	0.39
BAG5	0.39
RBM12B	0.39
PDCD10	0.39
SEL1L	0.39
NSF	0.39
COX15	0.39
MAP4K3	0.39
GSK3B	0.39
DNAJB14	0.39
HNRNPU	0.39
C5orf33	0.39
PIK3C2A	0.39
DDX3X	0.39
MSH3	0.39
MAPRE1	0.39
FAM179B	0.39
UBFD1	0.39
ATP13A3	0.39
VPS41	0.39
AFF4	0.39
NEDD1	0.39
SNX14	0.39
SLC30A6	0.39
VPS13B	0.39
C14orf101	0.39
C9orf152	0.38
LMAN1	0.38
PHF20	0.38
BIRC6	0.38
EEA1	0.38
MRPL35	0.38
2022-03-06	0.38
PHTF2	0.38
UBR3	0.38
MTHFD1	0.38
AFTPH	0.38
SBNO1	0.38
ATP5B	0.38
FBXO33	0.38
BTBD7	0.38
ALG10	0.38
PTCD3	0.38
MFSD8	0.38
CLCN3	0.38
GEMIN5	0.38
PIGM	0.38
TM9SF1	0.38
MOBKL1B	0.38
PEX1	0.38
LARP1	0.38
DPP8	0.38
PSEN1	0.38
PPIP5K2	0.38
PREPL	0.38
RRN3	0.38
SENP1	0.38
FAM151B	0.38
PRIM1	0.38
ACBD3	0.38
CBLL1	0.38
NIPA2	0.38
PRDM10	0.38
C4orf34	0.38
LIN7C	0.38
MRPL19	0.38
MIER3	0.38
GTF3C4	0.38
RBM18	0.38
PSMD1	0.38
VPS33A	0.38
ATAD1	0.38
OCRL	0.38
HSPA8	0.38
SLC30A7	0.38
SCFD1	0.38
RAB3GAP2	0.38
RG9MTD2	0.38
ADNP2	0.38
SPTLC1	0.38
DDX46	0.38
WDHD1	0.38
DNAJC10	0.38
C9orf91	0.38
SET	0.38
ATG12	0.38
MAPK9	0.38
KIF21A	0.38
SLC38A2	0.38
COL4A3BP	0.38
SMEK1	0.38
ZNF800	0.38
SDAD1	0.38
KPNA3	0.38
ATF1	0.38
NSD1	0.38
THAP5	0.38
C12orf29	0.38
MAP3K2	0.38
ZNF845	0.38
ZNF562	0.38
CEP350	0.37
ERBB2IP	0.37
RAB5A	0.37
ERCC8	0.37
RDH11	0.37
ZC3H14	0.37
TDP1	0.37
RAD50	0.37
PPP4R2	0.37
KLF3	0.37
EXD2	0.37
TMPO	0.37
KCTD20	0.37
PIK3R4	0.37
TOX4	0.37
COG5	0.37
ANKIB1	0.37
CCNT1	0.37
TUG1	0.37
ANAPC7	0.37
GNAQ	0.37
C5orf44	0.37
MED14	0.37
PRKCI	0.37
KIAA1143	0.37
TMEM209	0.37
COMMD10	0.37
MON2	0.37
MRS2	0.37
ZNF41	0.37
PWWP2A	0.37
ZNF664	0.37
C5orf22	0.37
KIAA1958	0.37
ACTR6	0.37
NCBP1	0.37
ZNF253	0.37
EXOC6	0.37
YTHDC2	0.37
GSR	0.37
C12orf41	0.37
ZFYVE16	0.37
DEPDC4	0.37
SERINC3	0.37
LYPLA1	0.37
ASB8	0.37
ARPP19	0.37
ZNF518A	0.37
ZSCAN29	0.37
PRPF40A	0.37
CDC73	0.37
SLC38A1	0.37
CANX	0.37
FBXO45	0.37
LOC284441	0.37
KPNA4	0.37
PPP3R1	0.37
XRCC5	0.37
FBXO28	0.37
RGMB	0.37
MRPS35	0.37
HSPA4	0.37
GAPVD1	0.37
PGM3	0.37
SUCLA2	0.37
C1orf58	0.37
PARG	0.37
TUBGCP4	0.37
PWP1	0.37
ESRP1	0.37
TAB3	0.37
USP8	0.37
GPR107	0.37
PTPLAD1	0.37
DBT	0.37
KIAA1244	0.37
PDIK1L	0.37
BAZ1A	0.37
RLIM	0.37
KPNB1	0.37
TMEM185B	0.37
RCHY1	0.37
DCLRE1A	0.37
TMBIM6	0.37
ZNF207	0.37
TAF2	0.37
TROVE2	0.37
RNF4	0.36
CASC4	0.36
GRPEL2	0.36
KIAA0368	0.36
PRMT5	0.36
TM9SF2	0.36
ACAP2	0.36
TBC1D15	0.36
VAMP7	0.36
IPO8	0.36
LSG1	0.36
MAPK14	0.36
C14orf143	0.36
CASP3	0.36
CAPZA1	0.36
ZBTB1	0.36
FBXW11	0.36
CSNK1G3	0.36
METT5D1	0.36
ZFHX3	0.36
ROD1	0.36
ZNF678	0.36
C10orf12	0.36
METTL2B	0.36
UTP14C	0.36
UBE2D3	0.36
ATP6V1A	0.36
ANKRD17	0.36
YWHAG	0.36
USP46	0.36
PI4K2B	0.36
SAMD12	0.36
KIF5B	0.36
C8orf37	0.36
ZNF252	0.36
FOXA1	0.36
ZNF623	0.36
RAPGEF6	0.36
NCOA6	0.36
ERCC4	0.36
INTS2	0.36
ZNF2	0.36
MNAT1	0.36
NAPG	0.36
LARS	0.36
SRBD1	0.36
NAA50	0.36
CBX5	0.36
DERL1	0.36
RNF14	0.36
RAB5B	0.36
LIN52	0.36
C6orf62	0.36
RCOR1	0.36
ZNF322A	0.36
KIAA1598	0.36
WASL	0.36
UGGT1	0.36
CNOT4	0.36
KIF20B	0.36
BZW1	0.36
UBXN2B	0.36
RMI1	0.36
ZYG11B	0.36
LNX2	0.36
DLD	0.36
DNAJC13	0.36
USP3	0.36
ENTPD7	0.36
RPE	0.36
WDFY3	0.36
POLR1B	0.36
ZDHHC20	0.36
TARDBP	0.36
CSNK2A1	0.36
DDX20	0.36
RNF103	0.36
SSR3	0.36
DNAJC14	0.36
SMC2	0.36
MAPK6	0.36
AP3M1	0.36
ZNF12	0.36
PRKAG1	0.36
EAF1	0.36
CAMSAP1L1	0.36
RNF160	0.36
ESCO2	0.36
PPA2	0.36
UBE3A	0.36
SFRS12IP1	0.36
RC3H1	0.36
MFAP3	0.36
GPN3	0.36
UBE4A	0.36
CEP97	0.36
WDR41	0.36
ARL6IP1	0.36
XRN2	0.36
XPO4	0.36
IMPAD1	0.36
KIAA0776	0.36
GLUD2	0.36
INTS8	0.36
ZNF765	0.36
LOC729082	0.36
STRBP	0.36
TDP2	0.36
TIMM17A	0.36
NUCKS1	0.36
LEO1	0.36
VKORC1L1	0.36
SR140	0.36
NHLRC2	0.36
NECAP1	0.36
CPSF6	0.36
LMBRD2	0.36
TPD52	0.36
MAPKAPK5	0.36
RBM47	0.36
EIF2AK1	0.36
TMEM194A	0.36
DCTN5	0.36
IPO9	0.35
RAB33B	0.35
GCC2	0.35
CUL4B	0.35
PPID	0.35
KIAA0232	0.35
SKIV2L2	0.35
RNF111	0.35
TERF1	0.35
ZFP106	0.35
PRKAR2A	0.35
ARMC1	0.35
SMC1A	0.35
2022-03-07	0.35
HIAT1	0.35
NUP50	0.35
DHX36	0.35
ATP2B1	0.35
G3BP1	0.35
GLE1	0.35
SPPL2A	0.35
SMG7	0.35
MMADHC	0.35
UHMK1	0.35
RP2	0.35
FANCF	0.35
RRM1	0.35
GSTCD	0.35
MYO5C	0.35
TAF9	0.35
DCTN4	0.35
FASTKD5	0.35
NARS	0.35
NUFIP2	0.35
KIAA1279	0.35
COG6	0.35
UTP23	0.35
USP37	0.35
PPAT	0.35
PAICS	0.35
WSB2	0.35
PDE12	0.35
KIF2A	0.35
ZKSCAN1	0.35
KDM5B	0.35
METTL14	0.35
CCDC125	0.35
ZNF143	0.35
GTF2I	0.35
C5orf15	0.35
REST	0.35
LOC647979	0.35
ZNF410	0.35
UBE3C	0.35
NUP43	0.35
EXOC1	0.35
ZNF480	0.35
GUF1	0.35
ZMYM2	0.35
STAMBP	0.35
C14orf109	0.35
PSMA1	0.35
LNPEP	0.35
ZNF669	0.35
ZNF81	0.35
POLA1	0.35
LATS1	0.35
DDX6	0.35
PRMT3	0.35
RSC1A1	0.35
MIB1	0.35
TMEM106B	0.35
ZNF200	0.35
NUP155	0.35
ATG2B	0.35
DHFR	0.35
ENOPH1	0.35
RAB1A	0.35
MTCH2	0.35
PTPDC1	0.35
SNAP23	0.35
SRPK2	0.35
YLPM1	0.35
ORC2L	0.35
RWDD4A	0.35
C14orf167	0.35
EIF1AX	0.35
RSRC1	0.35
ATR	0.35
DLST	0.35
XIAP	0.35
NF1	0.35
CDK13	0.35
HOOK1	0.35
NFYB	0.35
PRPF4B	0.35
FAM35B2	0.35
GOSR1	0.35
TIMM9	0.35
PDZD8	0.35
SELT	0.35
MBLAC2	0.35
C20orf94	0.35
PIGW	0.35
SAR1B	0.35
CNOT6L	0.35
UBE2G1	0.35
FAM98B	0.35
NOL11	0.35
ANAPC1	0.35
METAP1	0.35
TFAM	0.35
CALM1	0.35
ZNF704	0.35
NUPL1	0.35
CTCF	0.35
C22orf30	0.35
ANKRD13C	0.35
IARS2	0.35
PPIL1	0.34
CGRRF1	0.34
USP15	0.34
TXNRD1	0.34
DDX21	0.34
HAUS3	0.34
STAG2	0.34
NEDD4	0.34
SECISBP2	0.34
ARMC8	0.34
EXOC8	0.34
IPMK	0.34
SECISBP2L	0.34
NGLY1	0.34
DZIP3	0.34
FAM82B	0.34
AP4E1	0.34
DLG1	0.34
KIAA2018	0.34
DPY19L3	0.34
GNA13	0.34
RABIF	0.34
SEC16A	0.34
ANKHD1	0.34
FAM175B	0.34
XPNPEP3	0.34
GCN1L1	0.34
DCK	0.34
PSMA3	0.34
DIS3	0.34
THUMPD1	0.34
LRCH3	0.34
ATP6V1C1	0.34
LUZP6	0.34
DOPEY2	0.34
KLHDC2	0.34
SETD3	0.34
MINPP1	0.34
PLEKHB2	0.34
LRRC1	0.34
PSMA6	0.34
AP1G1	0.34
TCF12	0.34
MAGT1	0.34
TSNAX	0.34
SLC35B3	0.34
EAPP	0.34
DCUN1D4	0.34
ANKRD5	0.34
NIPA1	0.34
TMEM48	0.34
YTHDC1	0.34
AR	0.34
KBTBD7	0.34
UTP20	0.34
ZNF718	0.34
ARIH1	0.34
ZNF320	0.34
PBX1	0.34
SNX13	0.34
SMG1	0.34
C1orf9	0.34
FEM1C	0.34
METTL2A	0.34
MED13	0.34
SEC62	0.34
ISOC1	0.34
TRIM23	0.34
TBK1	0.34
C11orf58	0.34
ZNF281	0.34
SMN2	0.34
GALC	0.34
ZBTB26	0.34
BRAP	0.34
SCFD2	0.34
TMEM131	0.34
PIK3CB	0.34
IPP	0.34
UBN2	0.34
OSBP	0.34
NUP133	0.34
SLMO2	0.34
ZBTB41	0.34
AHCTF1	0.34
C12orf48	0.34
FBXO34	0.34
PLA2G12A	0.34
ATPBD4	0.34
ARL5A	0.34
ATRX	0.34
ZRANB3	0.34
N4BP2	0.34
TMED5	0.34
MTA3	0.34
SLC20A1	0.34
PIGN	0.34
C12orf51	0.34
FRRS1	0.34
SON	0.34
CYB5R4	0.34
SSR1	0.34
TMEM87A	0.34
MCM8	0.34
FNIP1	0.34
DYM	0.34
ZC3HAV1	0.34
PCYOX1	0.34
ERLEC1	0.34
ATF7IP	0.34
MRPL44	0.34
HSP90AA1	0.34
ZNF701	0.34
SRXN1	0.34
MMAA	0.34
TRIM32	0.34
STK35	0.34
ARID4A	0.34
RANBP2	0.34
ATP8B1	0.34
LCORL	0.34
STAU2	0.34
LCOR	0.34
FAM120A	0.34
BDP1	0.34
MKLN1	0.34
ACLY	0.34
TRIM24	0.34
KIAA1429	0.34
RMND5A	0.34
OCLN	0.34
TSTD2	0.34
STX17	0.34
CUL5	0.34
PALB2	0.34
FAM173B	0.34
VTA1	0.34
GOLGA4	0.34
C13orf23	0.34
CELF1	0.34
C3orf52	0.34
XRCC4	0.34
TRPM7	0.34
GTF2H1	0.34
RFC1	0.34
TP53RK	0.34
ZWILCH	0.34
GOLGA1	0.34
CISD2	0.34
PHF6	0.34
AAGAB	0.34
NOLC1	0.34
SGOL2	0.34
STRN	0.34
ATP7B	0.33
TAB2	0.33
SLC35A1	0.33
RFK	0.33
FAM20B	0.33
SLC31A1	0.33
CREB1	0.33
BRMS1L	0.33
CHURC1	0.33
KTN1	0.33
ATAD2B	0.33
MRPL50	0.33
CHM	0.33
B3GALNT1	0.33
RREB1	0.33
NCBP2	0.33
FAM115A	0.33
CKAP5	0.33
DLAT	0.33
CRKL	0.33
SMEK2	0.33
GTF3C3	0.33
TTC21B	0.33
ALDH6A1	0.33
LRBA	0.33
ALG10B	0.33
DAZAP2	0.33
SUZ12	0.33
NUDT4	0.33
ZC3H15	0.33
ACOX1	0.33
NAPEPLD	0.33
TOP1P1	0.33
PLDN	0.33
BRPF3	0.33
ZNF398	0.33
CAPN7	0.33
ZNF816A	0.33
FAM160B1	0.33
IKBKAP	0.33
GPBP1	0.33
C16orf63	0.33
FKBP3	0.33
RBM41	0.33
TMEM135	0.33
PSIMCT-1	0.33
TTC26	0.33
ZNF721	0.33
PLS1	0.33
GNL3L	0.33
XPO1	0.33
ERCC6L	0.33
SMC3	0.33
TRIP12	0.33
UBXN7	0.33
NOC3L	0.33
MOSPD1	0.33
RAD1	0.33
VTI1A	0.33
CRCP	0.33
FASTKD2	0.33
CLPX	0.33
TIMELESS	0.33
SLC25A36	0.33
PHF8	0.33
C1orf124	0.33
FAM178A	0.33
SPOPL	0.33
PRKAR1A	0.33
STARD3NL	0.33
CD2AP	0.33
ESF1	0.33
ARFGEF1	0.33
GAB1	0.33
EP300	0.33
KDM6A	0.33
CXorf23	0.33
TTC3	0.33
TM9SF4	0.33
WDR26	0.33
MFN1	0.33
WDR44	0.33
DHX29	0.33
CANT1	0.33
FECH	0.33
C2orf60	0.33
SPRED2	0.33
RNF41	0.33
FBXO22	0.33
ZNF609	0.33
OTUD4	0.33
YME1L1	0.33
ZNF322B	0.33
PPP1R12A	0.33
YWHAZ	0.33
XPOT	0.33
VPS29	0.33
GLO1	0.33
AMMECR1L	0.33
ZNF616	0.33
CSNK1G1	0.33
C14orf118	0.33
PBRM1	0.33
RNF20	0.33
RSBN1L	0.33
MGA	0.33
GTPBP10	0.33
ZXDB	0.33
SLC25A3	0.33
HOMEZ	0.33
SIP1	0.33
C18orf45	0.33
ZNF611	0.33
BRCA2	0.33
MRPL13	0.33
ZMYM4	0.33
RFC5	0.33
ALKBH1	0.33
MYO6	0.33
RBM23	0.33
VBP1	0.33
DHX9	0.33
NCKAP1	0.33
TAF13	0.33
PLAGL2	0.33
ZNF431	0.33
SPCS3	0.33
CTR9	0.33
RALGAPB	0.33
ARL8B	0.33
AP1AR	0.33
KHNYN	0.33
ZNF148	0.33
SNX4	0.33
TADA1	0.33
ROCK1	0.33
CAPRIN1	0.33
ETFDH	0.33
RALA	0.33
CCDC121	0.33
DBR1	0.33
ZDHHC6	0.32
USP42	0.32
ALG9	0.32
2022-09-07	0.32
INTS7	0.32
ABHD5	0.32
RBM16	0.32
UBE2H	0.32
PSMD10	0.32
WWC2	0.32
PIK3C3	0.32
GGPS1	0.32
ORC4L	0.32
CLDN12	0.32
BAZ2A	0.32
SATL1	0.32
SETX	0.32
WAC	0.32
PAIP1	0.32
POLE3	0.32
ZNF24	0.32
PJA2	0.32
ANKRD52	0.32
NCOA3	0.32
COQ5	0.32
C1orf103	0.32
TMEM97	0.32
RAB18	0.32
GRINL1A	0.32
INO80	0.32
ZKSCAN2	0.32
ASCC3	0.32
PAIP2	0.32
COIL	0.32
GAS2L3	0.32
GLUD1	0.32
CEP78	0.32
CKAP2	0.32
MAPKSP1	0.32
PIP4K2C	0.32
NPTN	0.32
ZNF510	0.32
TIAL1	0.32
CORO2A	0.32
SNX25	0.32
ATF7	0.32
HEATR5B	0.32
KIAA1012	0.32
TLK1	0.32
ATP6V0A2	0.32
TXLNG	0.32
TGFBRAP1	0.32
TCERG1	0.32
ARHGAP5	0.32
RYBP	0.32
SMARCC1	0.32
USP16	0.32
SHPRH	0.32
PARP2	0.32
NAA35	0.32
RRM2B	0.32
RFX7	0.32
IPO4	0.32
NUP37	0.32
FAM126B	0.32
RBM26	0.32
SLC25A17	0.32
H2AFV	0.32
RC3H2	0.32
AKAP11	0.32
ARHGAP11A	0.32
AFF1	0.32
TAF1B	0.32
SGPL1	0.32
PHKA1	0.32
PDS5B	0.32
NANP	0.32
CLTC	0.32
SRP9	0.32
LMTK2	0.32
KDM3B	0.32
NUP188	0.32
ZKSCAN5	0.32
EIF2A	0.32
KLHDC10	0.32
TTC17	0.32
MYST2	0.32
ATIC	0.32
C3orf38	0.32
FCHO2	0.32
ALG2	0.32
POLR2B	0.32
CHMP2B	0.32
C6orf120	0.32
TCTN3	0.32
BTBD1	0.32
TBL1XR1	0.32
HCFC2	0.32
BLZF1	0.32
FAM164A	0.32
GOLPH3	0.32
CBR4	0.32
ZNF260	0.32
SEC31A	0.32
VPS8	0.32
UBXN8	0.32
PHF14	0.32
HSPH1	0.32
TRIM59	0.32
DPAGT1	0.32
NUDCD1	0.32
ZNF420	0.32
FXC1	0.32
RTF1	0.32
COG3	0.32
PEX26	0.32
NCOA5	0.32
YAF2	0.32
KIAA0182	0.32
DDX1	0.32
FBXO38	0.32
RRP15	0.32
DCAF17	0.32
LMLN	0.32
FEM1B	0.32
NEK7	0.32
PDPK1	0.32
ZNF708	0.32
CDC42BPB	0.32
VPS24	0.32
RNF13	0.32
THAP6	0.32
VHL	0.32
CCDC43	0.32
PIGF	0.32
SNRNP48	0.32
GOLGB1	0.32
CKAP2L	0.32
RSPRY1	0.32
ZDHHC21	0.32
C18orf19	0.32
FAM13B	0.32
ELP4	0.32
DLG3	0.32
C3orf17	0.32
PLK4	0.32
ZMYM1	0.32
GNPDA2	0.32
UBA5	0.32
RAD18	0.32
RAD54B	0.32
BARD1	0.32
C17orf80	0.32
NUP35	0.32
FOXJ3	0.32
ESCO1	0.32
NOP14	0.32
RB1	0.32
SLC35D1	0.32
C4orf46	0.32
VCPIP1	0.32
COPZ1	0.32
ATP7A	0.32
C1orf25	0.32
COPS2	0.32
CWC27	0.32
ADAM10	0.32
SEC23A	0.32
VEZF1	0.32
ATAD2	0.32
UBTD2	0.32
BRWD3	0.32
ARF3	0.32
PSME3	0.32
RNF6	0.32
CIAO1	0.31
HS2ST1	0.31
ANKRD40	0.31
ISCA1	0.31
SLC25A24	0.31
COX16	0.31
KIAA0895	0.31
KLHL20	0.31
ZNF434	0.31
ZNF347	0.31
BMPR1A	0.31
TBC1D12	0.31
NEK4	0.31
ACBD5	0.31
KIAA1524	0.31
PPHLN1	0.31
PPP2R5C	0.31
RQCD1	0.31
LEMD3	0.31
ATL3	0.31
WDFY1	0.31
POLR2D	0.31
TMEM67	0.31
RBM22	0.31
C9orf5	0.31
ZNF680	0.31
MFSD9	0.31
RAB2A	0.31
FAM63B	0.31
C9orf102	0.31
UBE2Q2	0.31
OXSM	0.31
KBTBD4	0.31
TTLL5	0.31
AASDH	0.31
FBXO8	0.31
RAB11FIP2	0.31
BBS10	0.31
PHIP	0.31
BPTF	0.31
TET2	0.31
ZNF654	0.31
TMEM199	0.31
UBE2D2	0.31
MANEA	0.31
MTMR6	0.31
FAM177A1	0.31
OTUB2	0.31
BOD1L	0.31
APPL2	0.31
UBE2A	0.31
SAPS3	0.31
MIS12	0.31
RHBDD1	0.31
USP30	0.31
FAM133B	0.31
ZNF641	0.31
DBF4	0.31
PPTC7	0.31
EARS2	0.31
SENP6	0.31
NEK1	0.31
NDFIP2	0.31
C3orf63	0.31
SERINC5	0.31
MRPL3	0.31
KLHL12	0.31
KHDRBS1	0.31
TRAM1	0.31
ASAP2	0.31
ASXL2	0.31
MLL3	0.31
FTSJD1	0.31
CCNK	0.31
ASAH2B	0.31
CENPE	0.31
PDCL	0.31
TMED8	0.31
PRMT10	0.31
PPP6C	0.31
MTIF2	0.31
ZNF440	0.31
STAM	0.31
PCYT1A	0.31
ZFP30	0.31
NSL1	0.31
GALNT7	0.31
CD46	0.31
NUP98	0.31
TFB2M	0.31
METTL9	0.31
PPM1B	0.31
ZNF449	0.31
ANKRD50	0.31
HIF1AN	0.31
ZNF180	0.31
ZC3H11A	0.31
ZNF791	0.31
NCOA4	0.31
CCNI	0.31
CCDC41	0.31
OXA1L	0.31
PSMD12	0.31
PTCD2	0.31
FBXL17	0.31
C2orf15	0.31
TFCP2	0.31
THAP9	0.31
KIAA1712	0.31
TMEM127	0.31
ZCCHC4	0.31
FAM188A	0.31
DENND4A	0.31
GABPA	0.31
TSG101	0.31
PHF20L1	0.31
CTPS2	0.31
PNO1	0.31
EPS8	0.31
CAND1	0.31
FITM2	0.31
RBPJ	0.31
MFSD11	0.31
WDR20	0.31
SPAST	0.31
VPS35	0.31
FNIP2	0.31
UBE3B	0.31
C10orf118	0.31
SP3	0.31
USP12	0.31
MFAP1	0.31
DNAL1	0.31
HSDL2	0.31
ERGIC2	0.31
EDEM3	0.31
KIF16B	0.31
RAB27B	0.31
EPRS	0.31
OCIAD1	0.31
NSUN3	0.31
BTF3L4	0.31
ZBTB33	0.31
ZNF451	0.31
TRIM44	0.31
MORC4	0.31
TAOK1	0.31
CCNB1	0.31
DSTN	0.31
ATXN7L3B	0.31
CDK17	0.31
SLC4A5	0.31
SNX5	0.31
PDP2	0.31
ZNF720	0.31
POLR3F	0.31
TRIM37	0.31
RIF1	0.31
PTER	0.31
CCNT2	0.31
GCC1	0.31
SEPSECS	0.31
SASS6	0.31
SACM1L	0.31
HIF1A	0.31
RABL3	0.31
ANGEL2	0.31
KPNA6	0.31
OTUD6B	0.31
IMMT	0.31
RPP14	0.31
CEBPZ	0.31
LCMT2	0.31
CCDC47	0.31
ZNF430	0.31
TRNT1	0.31
AZI2	0.31
KLHL11	0.31
MTFR1	0.31
PTEN	0.31
ZNF277	0.31
THOC2	0.31
ZNF138	0.31
TBL2	0.31
SAP30L	0.31
NIN	0.31
PAFAH1B2	0.31
BUB1B	0.31
ATF6	0.31
CXXC4	0.31
MUTED	0.31
HEATR3	0.31
DDB1	0.3
RG9MTD1	0.3
CPD	0.3
SQLE	0.3
2022-09-02	0.3
ABCC5	0.3
HELZ	0.3
TUBGCP5	0.3
LYRM7	0.3
STARD7	0.3
HIVEP1	0.3
SMARCD1	0.3
VIPAR	0.3
MOCS3	0.3
C17orf71	0.3
TTC5	0.3
SLC30A4	0.3
LRRC40	0.3
GIN1	0.3
BCDIN3D	0.3
C18orf25	0.3
VANGL1	0.3
VPS52	0.3
TBCK	0.3
APPL1	0.3
SGPP1	0.3
KNTC1	0.3
NEBL	0.3
CCDC6	0.3
SENP8	0.3
TMEM62	0.3
COMMD8	0.3
POT1	0.3
MIPEP	0.3
PPP3CB	0.3
BAT2L2	0.3
ADIPOR1	0.3
ARCN1	0.3
SMNDC1	0.3
TC2N	0.3
NOM1	0.3
ZC3HAV1L	0.3
GABPB1	0.3
ZNF813	0.3
CAB39	0.3
CMBL	0.3
C8orf76	0.3
NUSAP1	0.3
SLC38A9	0.3
CSRP2BP	0.3
VCP	0.3
MAN1A2	0.3
ELK4	0.3
GHITM	0.3
SHQ1	0.3
ZC3H8	0.3
ABHD10	0.3
CENPK	0.3
ALMS1	0.3
GNAI3	0.3
PTPN12	0.3
KIF11	0.3
ZBTB39	0.3
SRP19	0.3
TNFAIP1	0.3
LOC729176	0.3
HTT	0.3
ABCB10	0.3
LARS2	0.3
ATRN	0.3
FAM45B	0.3
MMGT1	0.3
C1orf27	0.3
INTS6	0.3
KIAA0494	0.3
SPG11	0.3
TTC30B	0.3
ZNF627	0.3
STK3	0.3
SMAD2	0.3
NIF3L1	0.3
HAT1	0.3
GORASP2	0.3
NFXL1	0.3
CEP135	0.3
PCMT1	0.3
LIMA1	0.3
MED6	0.3
KRIT1	0.3
RIPK1	0.3
KIAA1468	0.3
PLEKHA8	0.3
ZMYM6	0.3
SGEF	0.3
BRCA1	0.3
FBXO11	0.3
DDX18	0.3
SUV420H1	0.3
IFNAR1	0.3
SRRD	0.3
HLCS	0.3
VPS4B	0.3
TMX3	0.3
IMPA1	0.3
UBR5	0.3
AKAP10	0.3
SYNJ2	0.3
HARBI1	0.3
TRAPPC10	0.3
TOR1B	0.3
PEX2	0.3
TP53INP1	0.3
ZNF714	0.3
ARID4B	0.3
HIP1	0.3
TAF9B	0.3
FAM35B	0.3
DMXL1	0.3
TOP2B	0.3
RSL1D1	0.3
MYEF2	0.3
TJP1	0.3
ZNF597	0.3
SENP2	0.3
JMY	0.3
PPAPDC2	0.3
ABCB7	0.3
THRAP3	0.3
GEN1	0.3
SNX19	0.3
ZNF35	0.3
LUC7L2	0.3
VPRBP	0.3
ZFP1	0.3
ZDHHC17	0.3
METTL6	0.3
STAG1	0.3
TOM1L1	0.3
MIA3	0.3
ADSS	0.3
MLH1	0.3
RNF34	0.3
MORC3	0.3
CGGBP1	0.3
HPS3	0.3
SETD5	0.3
ZNF195	0.3
ISCA1P1	0.3
FANCI	0.3
ERCC6	0.3
MIOS	0.3
CSTF1	0.3
MTMR1	0.3
GINS1	0.3
YTHDF1	0.3
GIGYF2	0.3
ALS2	0.3
GFPT1	0.3
DDX31	0.3
MTMR15	0.3
NCOA2	0.3
ZNF197	0.3
MRRF	0.3
NPEPPS	0.3
ZBTB9	0.3
SCRN3	0.3
ZNF828	0.3
LGALS8	0.3
FAM49B	0.3
CNST	0.3
